# Supplementary material for: Inhibition of SUV39H1 reduces tumor angiogenesis via Notch1 in oral squamous cell carcinoma
Source: PeerJ. 2024 Apr 19;12:e17222. doi: 10.7717/peerj.17222 (PMC11034493; doi:10.7717/peerj.17222)
Supplement: Supplemental Information 2 — Immunohistochemical experimental data for statistical analysis. [file peerj-12-17222-s002.xlsx]

## Sheet: Sheet1
Serial number	Gender	Age	Tobacco	Alcohol	Tumor site	Pathological grade	T stage	N	M	OSCC SUV39H1 expression	NM SUV39H1 expression	CD31 MVD	OSCC NOTCH11 expression
1	male	61	Yes	Yes	Buccal	Well differentiated	Ⅰ	0	0	2	2	12.605	5
2	male	41	Yes	Yes	Tongue	Moderately/Poorly differentiated	Ⅰ	0	0	3	2	2.10084	5
3	male	50	Yes	No	Buccal	Moderately/Poorly differentiated	Ⅰ	0	0	2	2	6.30252	2
4	male	66	Yes	No	Tongue	Moderately/Poorly differentiated	Ⅰ	0	0	2	3	4.20168	3
5	male	57	Yes	No	Palate	Well differentiated	Ⅰ	0	0	3	1	13.8655	2
6	male	55	Yes	No	Buccal	Well differentiated	Ⅰ	0	0	1	1	11.3445	5
7	female	59	Yes	Yes	Tongue	Moderately/Poorly differentiated	Ⅲ	1	0	2	1	11.7647	3
8	male	49	Yes	No	Tongue	Moderately/Poorly differentiated	Ⅱ	0	0	2	1	6.30252	2
9	male	57	Yes	Yes	Buccal	Well differentiated	Ⅱ	0	0	3	1	5.88235	4
10	male	59	Yes	Yes	Buccal	Moderately/Poorly differentiated	Ⅱ	0	0	2	1	4.62185	4
11	male	47	Yes	Yes	Buccal	Well differentiated	Ⅱ	0	0	4	1	8.40336	2
12	male	54	Yes	No	Tongue	Well differentiated	Ⅱ	0	0	4	1	12.605	2
13	male	57	Yes	No	Gingiva	Well differentiated	Ⅰ	0	0	5	1	10.084	2
14	male	32	Yes	No	Buccal	Moderately/Poorly differentiated	Ⅱ	0	0	5	1	9.2437	4
15	male	62	Yes	No	Buccal	Well differentiated	Ⅲ	0	0	3	1	14.2857	4
16	male	66	Yes	Yes	Gingiva	Well differentiated	Ⅱ	0	0	4	1	21.0084	2
17	female	56	No	Yes	Gingiva	Well differentiated	Ⅱ	0	0	3	1	9.66387	3
18	male	41	Yes	No	Buccal	Well differentiated	Ⅳ	0	0	5	1	9.2437	2
19	male	62	Yes	No	Tongue	Moderately/Poorly differentiated	Ⅱ	0	0	6	1	23.5294	2
20	male	52	Yes	Yes	Gingiva	Well differentiated	Ⅲ	1	0	5	1	9.66387	4
21	male	54	Yes	Yes	Gingiva	Moderately/Poorly differentiated	Ⅳ	2	0	5	2	9.2437	4
22	male	49	Yes	No	Tongue	Moderately/Poorly differentiated	Ⅳ	2	0	5	2	1.68067	4
23	male	49	Yes	No	Buccal	Moderately/Poorly differentiated	Ⅳ	2	0	5	3	3.36134	1
24	male	54	Yes	No	Tongue	Well differentiated	Ⅲ	0	0	6	3	4.62185	1
25	male	49	No	No	Tongue	Moderately/Poorly differentiated	Ⅲ	0	0	6	3	2.10084	1
26	male	66	Yes	No	Tongue	Well differentiated	Ⅲ	0	0	6	1	5.04202	1
27	male	82	No	No	Lip	Well differentiated	Ⅲ	0	0	7	3	8.82353	1
28	male	60	Yes	Yes	Tongue	Well differentiated	Ⅲ	0	0	7	3	9.2437	1
29	male	59	Yes	Yes	Tongue	Well differentiated	Ⅳ	2	0	7	2	6.72269	1
30	male	52	Yes	Yes	Tongue	Well differentiated	Ⅰ	0	0	2	1	18.9076	2
31	male	54	No	Yes	Tongue	Well differentiated	Ⅰ	0	0	2	1	10.084	4
32	male	52	Yes	No	Buccal	Well differentiated	Ⅰ	0	0	3	2	9.66387	4
33	male	48	No	No	Tongue	Well differentiated	Ⅰ	0	0	6	2	34.4538	6
34	female	58	No	No	Gingiva	Well differentiated	Ⅲ	1	0	6	2	26.4706	6
35	male	38	Yes	No	Buccal	Well differentiated	Ⅳ	0	0	7	3	27.3109	7
36	male	54	Yes	No	Buccal	Well differentiated	Ⅱ	0	0	7	3	21.4286	7
37	male	60	No	No	Tongue	Well differentiated	Ⅰ	0	0	7	1	14.7059	7
38	male	48	Yes	No	Tongue	Well differentiated	Ⅱ	0	0	6	1	22.2689	7
39	male	55	Yes	No	Oropharynx	Moderately/Poorly differentiated	Ⅲ	0	0	3	1	16.8067	7
40	male	68	No	No	Gingiva	Moderately/Poorly differentiated	Ⅱ	0	0	3	1	22.6891	5
41	male	56	Yes	No	Buccal	Moderately/Poorly differentiated	Ⅱ	0	0	3		21.4286	5
42	male	74	Yes	No	Buccal	Moderately/Poorly differentiated	Ⅲ	1	0	4		32.3529	5
43	male	50	No	Yes	Tongue	Well differentiated	Ⅳ	2	0	4		36.9748	7
44	male	63	Yes	No	Tongue	Well differentiated	Ⅳ	2	0	4		28.1513	5
45	male	49	No	No	Tongue	Well differentiated	Ⅳ	3	0	4		17.6471	5
46	male	40	Yes	No	Tongue	Well differentiated	Ⅲ	0	0	4		15.5462	4
47	female	59	No	No	Gingiva	Moderately/Poorly differentiated	Ⅲ	0	0	4		20.1681	3
48	male	49	Yes	No	Buccal	Well differentiated	Ⅲ	0	0	3		6.30252	3
49	male	58	Yes	No	Buccal	Moderately/Poorly differentiated	Ⅲ	0	0	3		7.14286	3
50	male	61	Yes	No	Buccal	Well differentiated	Ⅰ	0	0	4		7.56303	4
51	male	56	No	No	Tongue	Well differentiated	Ⅲ	0	0	3		28.9916	4
52	male	49	Yes	No	Buccal	Moderately/Poorly differentiated	Ⅲ	1	0	3		27.3109	3
53	female	84	Yes	No	Tongue	Moderately/Poorly differentiated	Ⅳ	2	0	4		29.4118	6
54	male	56	Yes	No	Buccal	Moderately/Poorly differentiated	Ⅲ	0	0	4		31.5126	5
55	male	61	No	Yes	Buccal	Well differentiated	Ⅰ	0	0	5		22.2689	5
56	male	73	Yes	Yes	Tongue	Well differentiated	Ⅰ	0	0	6		16.8067	4
57	male	67	Yes	Yes	Tongue	Well differentiated	Ⅰ	0	0	4		36.1345	7
58	female	79	Yes	Yes	Tongue	Moderately/Poorly differentiated	Ⅰ	0	0	5		27.3109	7
59	male	55	Yes	Yes	Buccal	Moderately/Poorly differentiated	Ⅲ	1	0	5		18.9076	7
60	male	65	No	Yes	Tongue	Well differentiated	Ⅱ	0	0	7		29.4118	7
61	male	49	Yes	Yes	Tongue	Well differentiated	Ⅱ	0	0	5		31.9328	7
62	male	49	Yes	Yes	Buccal	Moderately/Poorly differentiated	Ⅱ	0	0	5		30.6723	3
63	male	51	No	Yes	Tongue	Well differentiated	Ⅲ	0	0	5		18.9076	3
64	male	42	Yes	Yes	Tongue	Moderately/Poorly differentiated	Ⅱ	0	0	6		32.7731	3
65	male	51	Yes	Yes	Tongue	Moderately/Poorly differentiated	Ⅱ	0	0	5		13.8655	3
66	male	58	Yes	Yes	Palate	Well differentiated	Ⅲ	1	0	5		23.9496	6
67	male	50	Yes	Yes	Buccal	Moderately/Poorly differentiated	Ⅲ	1	0	6		2.52101	6
68	male	73	No	Yes	Oropharynx	Well differentiated	Ⅲ	1	0	5		2.52101	7
69	male	64	Yes	Yes	Buccal	Well differentiated	Ⅳ	2	0	4		23.1092	5
70	female	54	Yes	Yes	Buccal	Well differentiated	Ⅳ	2	0	5		31.9328	5
71	male	62	No	Yes	Tongue	Well differentiated	Ⅳ	2	0	6		28.1513	3
72	male	49	Yes	Yes	Buccal	Well differentiated	Ⅲ	0	0	6		21.0084	4
73	male	46	Yes	Yes	Gingiva	Well differentiated	Ⅲ	0	0	5		16.8067	3
74	male	66	Yes	Yes	Mouth floor	Moderately/Poorly differentiated	Ⅲ	0	0	5		10.9244	4
75	male	70	No	Yes	Tongue	Moderately/Poorly differentiated	Ⅲ	0	0	5		14.2857	3
76	male	62	Yes	Yes	Tongue	Moderately/Poorly differentiated	Ⅲ	0	0	4		10.084	3
77	male	53	Yes	Yes	Buccal	Moderately/Poorly differentiated	Ⅳ	2	0	4		11.3445	3
78	male	67	No	Yes	Oropharynx	Moderately/Poorly differentiated	Ⅳ	2	0	5		8.82353	3
79	male	46	Yes	Yes	Buccal	Well differentiated	Ⅲ	0	0	5		16.8067	4
80	female	73	Yes	Yes	Tongue	Well differentiated	Ⅲ	0	0	5		31.9328	5
