# Supplementary material for: Inhibition of SUV39H1 reduces tumor angiogenesis via Notch1 in oral squamous cell carcinoma
Source: PeerJ. 2024 Apr 19;12:e17222. doi: 10.7717/peerj.17222 (PMC11034493; doi:10.7717/peerj.17222)
Supplement: Supplemental Information 3 — The data were analyzed statistically in vitro. [file peerj-12-17222-s003.xlsx]

## Sheet: body weight
	vehicle g
NO.	0 day	18 days
1	18.8	17.9		-0.9
2	20.3	17.9		-2.4
3	19.5	19.1		-0.4
4	19.7	18.3		-1.4
5	20.2	17		-3.2
NO.	Chaetocin g
	0 day	18 days
1	19.8	20		0.2
2	19.6	19.7		0.1
3	20.5	19.1		-1.4
4	18.6	17.4		-1.2
5	20.2	19.2		-1

## Sheet: tumor weight in vivo
NO.	vehicle mg	Chaetocin mg
1	405.6	40.6
2	219.5	68.3
3	314.6	73.5
4	417.8	28.8
5	278.8	34.7

## Sheet: tumor size
	Days	vehicle 1	vehicle 1	vehicle 2	vehicle 2	vehicle 3	vehicle 3	vehicle 4	vehicle 4	vehicle 5	vehicle 5
		Long diameter	Short diameter	Long diameter	Short diameter	Long diameter	Short diameter	Long diameter	Short diameter	Long diameter	Short diameter
	1	0.5	0.4	0.5	0.4	0.6	0.4	0.5	0.4	0.5	0.4	0.04		0.04		0.048		0.04		0.04
	3	0.6	0.4	0.6	0.4	0.5	0.4	0.5	0.5	0.5	0.5	0.048		0.048		0.04		0.0625		0.0625
	5	0.7	0.5	0.6	0.5	0.6	0.5	0.7	0.5	0.5	0.5	0.0875		0.075		0.075		0.0875		0.0625
	7	0.7	0.5	0.6	0.5	0.7	0.5	0.8	0.5	0.7	0.5	0.0875		0.075		0.0875		0.1		0.0875
	9	0.8	0.6	0.6	0.5	0.8	0.6	0.9	0.7	0.8	0.6	0.144		0.075		0.144		0.2205		0.144
	12	1.1	0.8	0.9	0.7	1	0.7	1.2	0.9	1.2	0.8	0.352		0.2205		0.245		0.486		0.384
	15	1.3	1	1	1	1.1	0.9	1.4	1.1	1.4	1	0.65		0.5		0.4455		0.847		0.7
	18	1.6	1.2	1.2	1	1.4	1.1	1.9	1.4	1.8	1.2	1.152		0.6		0.847		1.862		1.296
												0
	Days	Chaetocin1	Chaetocin1	Chaetocin2	Chaetocin2	Chaetocin3	Chaetocin3	Chaetocin4	Chaetocin4	Chaetocin5	Chaetocin5
		Long diameter	Short diameter	Long diameter	Short diameter	Long diameter	Short diameter	Long diameter	Short diameter	Long diameter	Short diameter
	1	0.5	0.5	0.6	0.5	0.5	0.5	0.5	0.5	0.5	0.4	0.0625		0.075		0.0625		0.0625		0.04
	3	0.5	0.4	0.6	0.4	0.6	0.4	0.5	0.4	0.5	0.5	0.04		0.048		0.048		0.04		0.0625
	5	0.5	0.5	0.6	0.4	0.7	0.5	0.5	0.5	0.6	0.5	0.0625		0.048		0.0875		0.0625		0.075
	7	0.5	0.5	0.7	0.5	0.7	0.5	0.5	0.5	0.5	0.5	0.0625		0.0875		0.0875		0.0625		0.0625
	9	0.5	0.4	0.7	0.5	0.7	0.5	0.6	0.5	0.5	0.5	0.04		0.0875		0.0875		0.075		0.0625
	12	0.5	0.4	0.7	0.5	0.8	0.7	0.6	0.4	0.6	0.5	0.04		0.0875		0.196		0.048		0.075
	15	0.5	0.5	0.8	0.7	0.9	0.7	0.6	0.5	0.6	0.5	0.0625		0.196		0.2205		0.075		0.075
	18	0.6	0.5	1	0.9	1.1	0.9	0.8	0.6	0.8	0.7	0.075		0.405		0.4455		0.144		0.196
	Days	vehicle 1	vehicle 2	vehicle 3	vehicle 4	vehicle 5
	1	0.04	0.04	0.048	0.04	0.04		40	40	48	40	40
	3	0.048	0.048	0.04	0.0625	0.0625		48	48	40	62.5	62.5
	5	0.0875	0.075	0.075	0.0875	0.0625		87.5	75	75	87.5	62.5
	7	0.0875	0.075	0.0875	0.1	0.0875		87.5	75	87.5	100	87.5
	9	0.144	0.075	0.144	0.2205	0.144		144	75	144	220.5	144
	12	0.352	0.2205	0.245	0.486	0.384		352	220.5	245	486	384
	15	0.65	0.5	0.4455	0.847	0.7		650	500	445.5	847	700
	18	1.152	0.6	0.847	1.862	1.296		1152	600	847	1862	1296
	Days	Chaetocin1	Chaetocin2	Chaetocin3	Chaetocin4	Chaetocin5
	1	0.0625	0.075	0.0625	0.0625	0.04		62.5	75	62.5	62.5	40
	3	0.04	0.048	0.048	0.04	0.0625		40	48	48	40	62.5
	5	0.0625	0.048	0.0875	0.0625	0.075		62.5	48	87.5	62.5	75
	7	0.0625	0.0875	0.0875	0.0625	0.0625		62.5	87.5	87.5	62.5	62.5
	9	0.04	0.0875	0.0875	0.075	0.0625		40	87.5	87.5	75	62.5
	12	0.04	0.0875	0.196	0.048	0.075		40	87.5	196	48	75
	15	0.0625	0.196	0.2205	0.075	0.075		62.5	196	220.5	75	75
	18	0.075	0.405	0.4455	0.144	0.196		75	405	445.5	144	196

## Sheet: IN VIVO IHC
SUV39H1	NO.1 mice	NO.2 mice	NO.3 mice	NO.4 mice	NO.5 mice
Vehicle	6	7	7	5	6
Chaetocin	1	3	1	1	1
NOTCH1	NO.1 mice	NO.2 mice	NO.3 mice	NO.4 mice	NO.5 mice
Vehicle	7	5	5	5	7
Chaetocin	1	2	2	1	1
Ki67	NO.1 mice	NO.2 mice	NO.3 mice	NO.4 mice	NO.5 mice
Vehicle	5	6	5	7	7
Chaetocin	3	3	2	2	2

## Sheet: MVD
NO.	OSCC CD31 expression		Vehicle
1	30	259	11.583
2	22		8.49421
3	33		12.7413
4	39		15.0579
5	50		19.305
NO.	OSCC CD31 expression		Chaetocin
1	12		4.6332
2	13		5.01931
3	7		2.7027
4	15		5.79151
5	6		2.3166
			plotting scale
	length	7.4	0.4cm/50um	18.5
	Width	5.6	0.4cm/50um	14	259

## Sheet: Tube formation
CTR	Scramble	siRNA	DAPT	Si+DAPT
49	55	31	35	6
76	67	44	40	5
66	74	45	34	7
100	112.245	63.2653	71.4286	12.2449
100	88.1579	57.8947	52.6316	6.57895
100	112.121	68.1818	51.5152	10.6061

## Sheet: Transwell
CTR	Scramble	siRNA	DAPT	Si+DAPT
83	89	58	51	17
104	97	62	54	19
86	112	43	43	25
