# Supplementary material for: Inhibition of SUV39H1 reduces tumor angiogenesis via Notch1 in oral squamous cell carcinoma
Source: PeerJ journal article supplement (doi:10.7717/peerj.17222), 2024-04-19
Supplement: Supplementary_Figure_1.pdf [file Supplementary_Figure_1.pdf]

p-value =  $1.8\text{e-}07$

R = 0.23

log2(PECAM1 TPM)

7  
6  
5  
4  
3  
2  
1

0

1

2

3

4

5

6

7

log2(NOTCH1 TPM)
